# Supplementary material
Source: publisher figshare collection journal article supplement (https://sage.figshare.com/ndownloader/files/14147207)
Supplement: Supplementary file 1 [file 14147207]

**Supplementary Figure 1.** Summary of the Risk of Bias for the included Studies (only randomized controlled study).

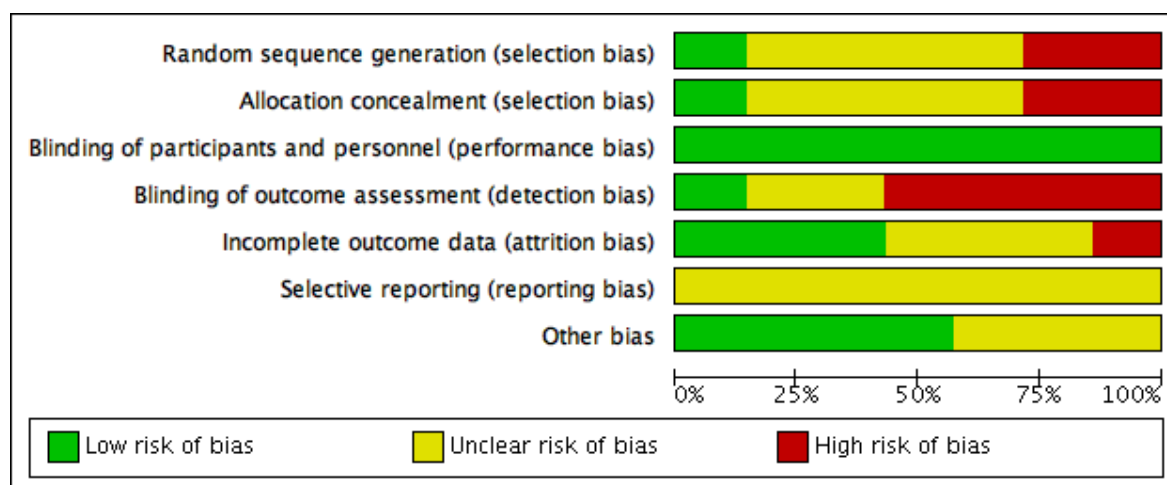

|                             | Random sequence generation (selection bias) | Allocation concealment (selection bias) | Blinding of participants and personnel (performance bias) | Blinding of outcome assessment (detection bias) | Incomplete outcome data (attrition bias) | Selective reporting (reporting bias) | Other bias |
|-----------------------------|---------------------------------------------|-----------------------------------------|-----------------------------------------------------------|-------------------------------------------------|------------------------------------------|--------------------------------------|------------|
| 01 Gómez L, et al. 2017     | ?                                           | ?                                       | +                                                         | ?                                               | ?                                        | ?                                    | ?          |
| 02 Sokhadze EM, et al. 2014 | -                                           | -                                       | +                                                         | -                                               | +                                        | ?                                    | +          |
| 03 Sokhadze EM, et al. 2014 | -                                           | -                                       | +                                                         | -                                               | +                                        | ?                                    | +          |
| 04 Panerai S, et al. 2014   | ?                                           | +                                       | +                                                         | +                                               | -                                        | ?                                    | +          |
| 05 Sokhadze EM, et al. 2012 | ?                                           | ?                                       | +                                                         | -                                               | ?                                        | ?                                    | ?          |
| 06 Casanova MF, et al. 2012 | ?                                           | ?                                       | +                                                         | -                                               | ?                                        | ?                                    | ?          |
| 07 Weaver L, et al. 2012    | +                                           | ?                                       | +                                                         | ?                                               | +                                        | ?                                    | +          |
